# Supplementary material
Source: PubMed Central journal article supplement (PMC7963965)
Supplement: 1853_table.pdf [file 1853_table.pdf]

**On-line Table 1: Main characteristics of the 5 models most frequently used for the evaluation of aneurysm treatment devices**

| Species, Aneurysm                                   | Spontaneous Thrombosis/ Patency                                  | Angio after Coiling                      | Histopathology after Coiling                      | Aneurysm Size, w × l (mm) | Neck Size (mm)     | Surgical Morbidity, Mortality     | Advantages                                                                                                                                                                                    | Disadvantages                                                                                  |
|-----------------------------------------------------|------------------------------------------------------------------|------------------------------------------|---------------------------------------------------|---------------------------|--------------------|-----------------------------------|-----------------------------------------------------------------------------------------------------------------------------------------------------------------------------------------------|------------------------------------------------------------------------------------------------|
| Canine, lateral wall <sup>7,36-38,41,51-53,59</sup> | Thrombosis in 10%; long-term patency during 7 months and 6 years | Almost complete aneurysm occlusion       | Variable healing response with few recurrences    | 5 × 6 to 10 × 25          | 4–9                | No                                | Reliable anesthesia; easy to create and to manipulate the aneurysm size ratio to its parent artery; testing of aneurysm occlusion devices requiring large vessels; 2 aneurysms in each animal | Low rate of recurrences                                                                        |
| Canine, bifurcation <sup>29,37,38</sup>             | Lack of spontaneous thrombosis and rupture                       | Propensity for recurrence                | Incomplete healing, with thin neointima           | 11 × 25                   | 4–7                | Minimal                           | Similar hemodynamic stress to human ICAs; high-quality angio evaluations, demonstration of recurrences                                                                                        | Single aneurysm per animal                                                                     |
| Swine, lateral wall <sup>13,35,48,53-55,58</sup>    | Propensity for spontaneous thrombosis or early rupture           | Complete aneurysm occlusion in all cases | Robust healing with thick neointima               | 8 × 10                    | 2–9                | No                                | Reproducible in its size, shape, hemodynamics                                                                                                                                                 | Limited validity for testing aneurysm devices                                                  |
| Rabbit, bifurcation <sup>8,14,18,30,31,70,71</sup>  | Patency for 3 and 6 months after surgical creation               | Frequent complete aneurysm occlusion     | Incomplete obliteration with poor overall healing | 4.3 × 5.8                 | 4                  | High with parent artery occlusion | Similar size with high reproducibility and constant volume ratio                                                                                                                              | Small for testing human devices                                                                |
| Rabbit, elastase <sup>32,40,45,71</sup>             | No spontaneous thrombosis for 24 months                          | Variable                                 | Poor overall healing                              | 4.5 × 7.5                 | Narrow neck, <4 mm | High to minimal to no mortality   | Ease of handling; appropriate size of parent vessel and aneurysm                                                                                                                              | Variation in aneurysm size and neck-to-dome ratios; limited in the evaluation of large devices |
